# Supplementary material
Source: Springer Nature journal article supplement (https://www.springermedizin.de/resource/supplementary/12985_2010_933_MOESM1_ESM.pdf/9608770)

0.001

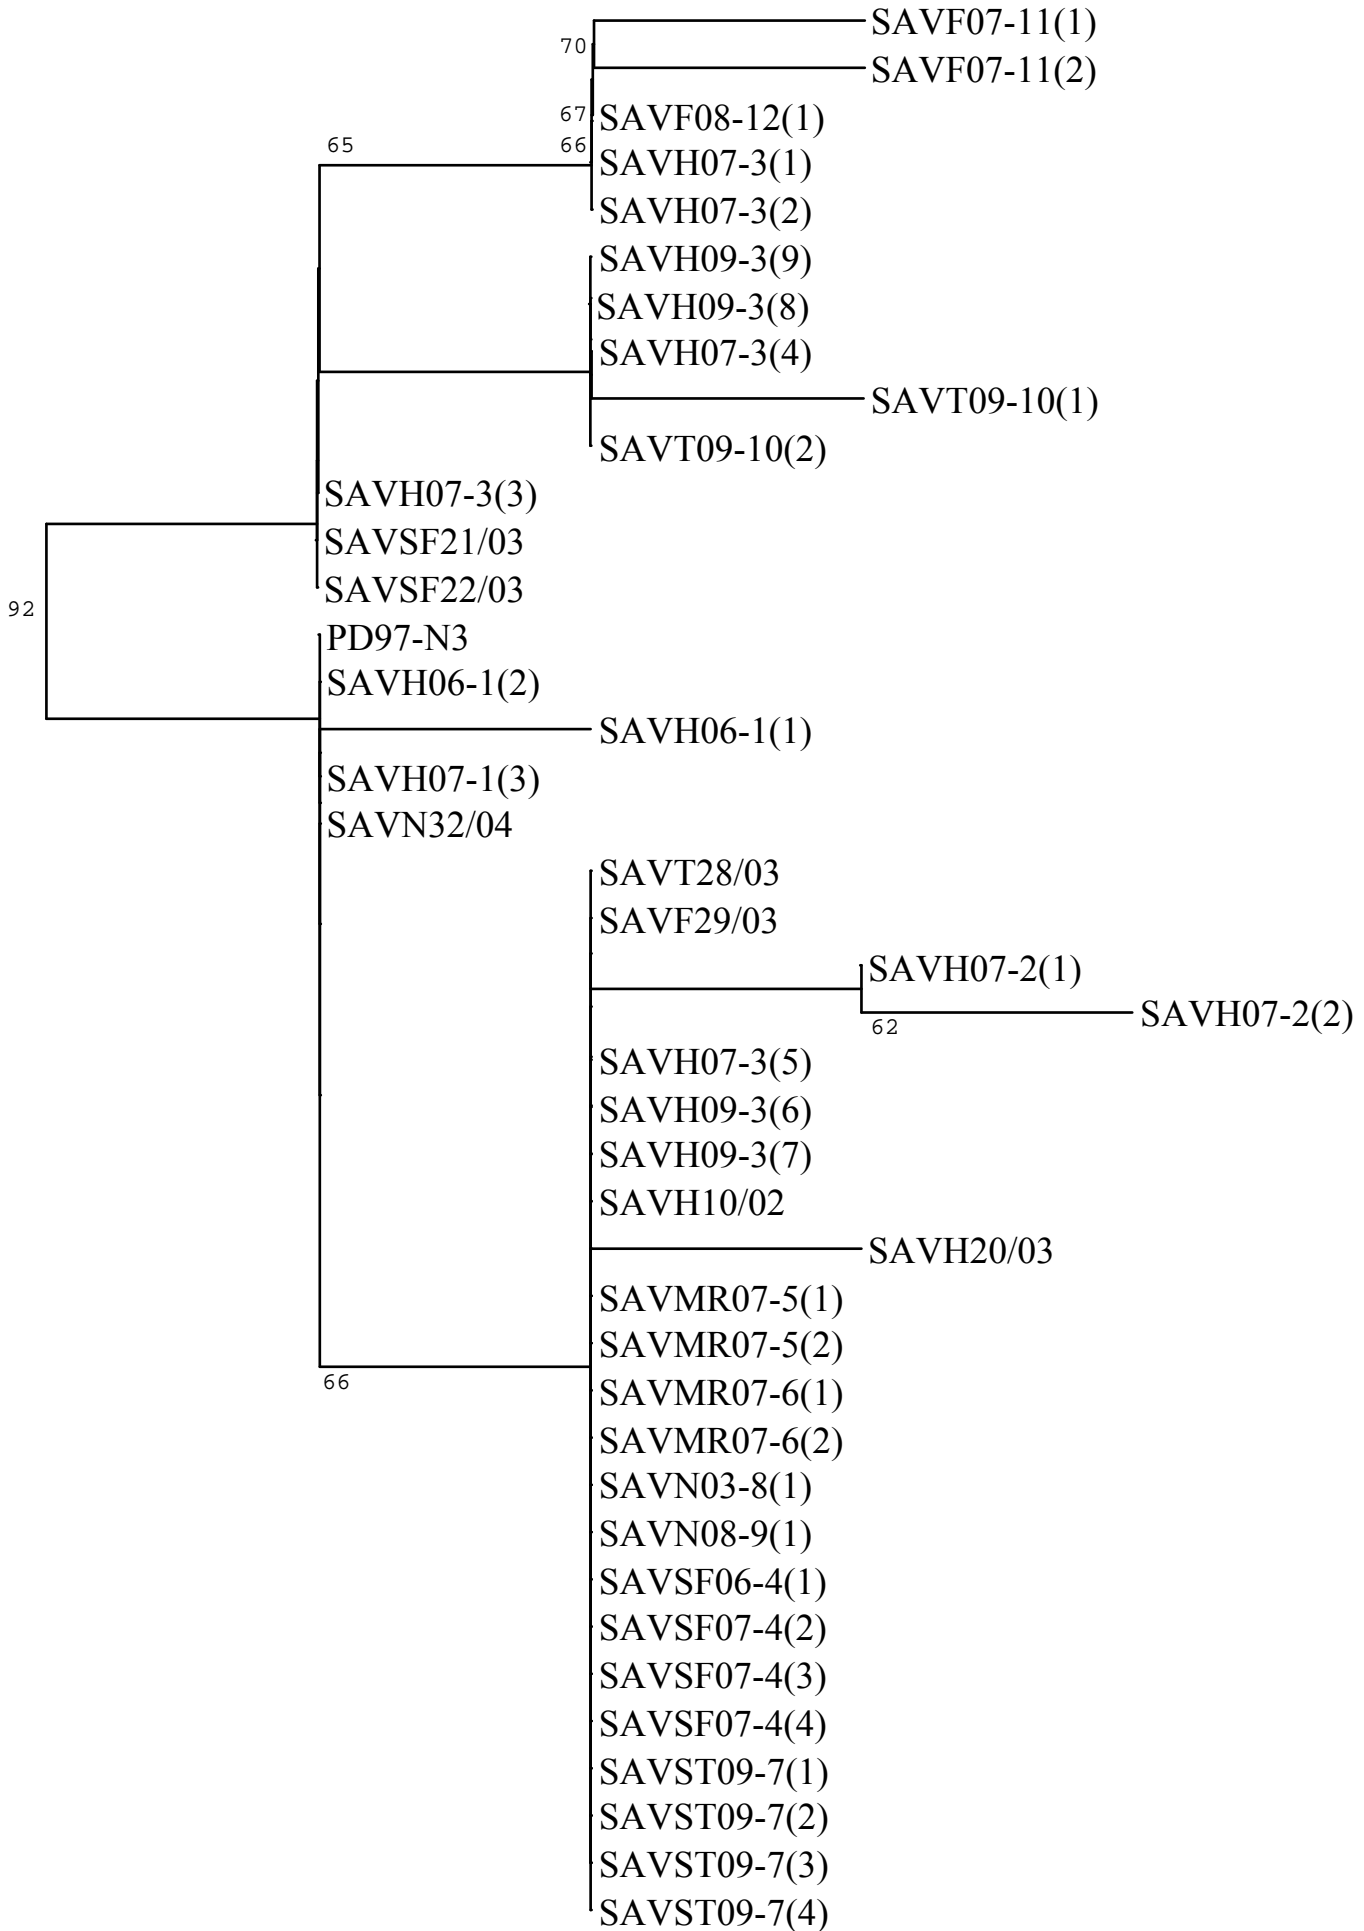

Supplement: MOESM1 [file 9608770]
